# Supplementary material for: Pyrolysis of naphthol functionalized polytriarylamine for efficient sodium-ion storage
Source: Royal Society of Chemistry journal article supplement (doi:10.1039/d4nj01524j), 2024-01-01
Supplement: d4nj01524j1.pdf [file d4nj01524j1.pdf]

## Supporting Information

### Pyrolysis of Naphthol Functionalized Polytriarylamine for Efficient Sodium-Ion Storage

Taehyoung Kim<sup>1,a</sup>, Seongwook Chae<sup>2,a</sup>, Taewoong Lee<sup>2,a</sup>, Young Rok Yoon<sup>3</sup>, Jae Bin Park<sup>2</sup>,  
Byeong Jin Kim<sup>2</sup>, Kyoungun Lee<sup>1</sup>, In Young Song<sup>1</sup>, Hwanhui Yun<sup>1</sup>, Wang-Eun Lee<sup>1</sup>,  
Kyuyoung Heo<sup>1</sup>, Sang Youl Kim<sup>3\*</sup>, Jinhee Lee<sup>1\*</sup>, and Jin Hong Lee<sup>2\*</sup>

<sup>1</sup> Reliability Assessment Center for Chemical Materials, Korea Research Institute of Chemical Technology (KRICT), Daejeon, 34114, Republic of Korea

<sup>2</sup> School of Chemical Engineering, Pusan National University, Busan, 46241, Republic of Korea

<sup>3</sup> Department of Chemistry, Korea Advanced Institute of Science and Technology, Daejeon 34141, Republic of Korea

<sup>a</sup> These authors contributed equally to this work.

\*To whom correspondence should be addressed: [kimsy@kaist.ac.kr](mailto:kimsy@kaist.ac.kr), [jinhee@kriict.re.kr](mailto:jinhee@kriict.re.kr), and [jinhong.lee@pusan.ac.kr](mailto:jinhong.lee@pusan.ac.kr)

**Table S1.** Surface properties of PDNOHs.

| PDNOH   | $S_{\text{BET}}^a$<br>( $\text{m}^2/\text{g}$ ) | $V_{\text{total}}^b$<br>( $\text{cm}^3/\text{g}$ ) | Pore size <sup>c</sup><br>(nm) | $S_{\text{micro}}^d$<br>( $\text{m}^2/\text{g}$ ) | $V_{\text{micro}}^e$<br>( $\text{cm}^3/\text{g}$ ) |
|---------|-------------------------------------------------|----------------------------------------------------|--------------------------------|---------------------------------------------------|----------------------------------------------------|
| @650 °C | 298.3                                           | 0.109                                              | 1.583                          | 321.1                                             | 0.100                                              |
| @800 °C | 112.5                                           | 0.034                                              | 1.355                          | 102.0                                             | 0.033                                              |

<sup>a</sup>BET surface area, <sup>b</sup>Total pore volume, <sup>c</sup>Average pore diameter, <sup>d</sup>Surface area of micropore calculated by t-PLOT analysis, <sup>e</sup>Pore volume of micropore calculated by t-Plot analysis.

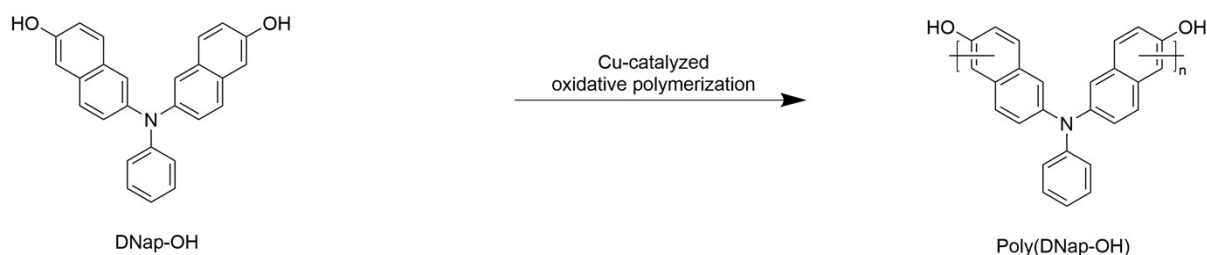

**Figure S1.** Polymerization scheme of Poly(DNap-OH).

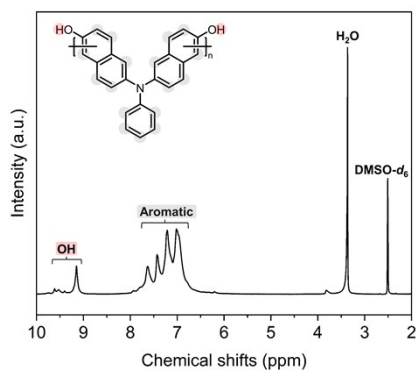

**Figure S2.** <sup>1</sup>H-NMR spectrum of Poly(DNap-OH) in DMSO-*d*<sub>6</sub>.

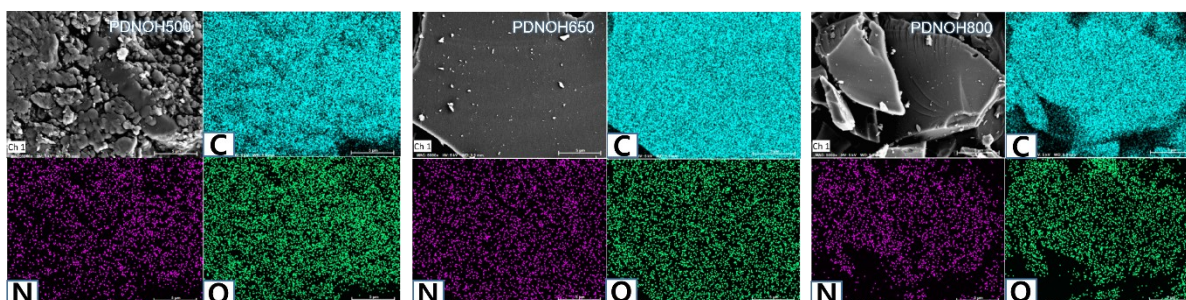

**Figure S3.** SEM-EDS mapping of PDNOHs.

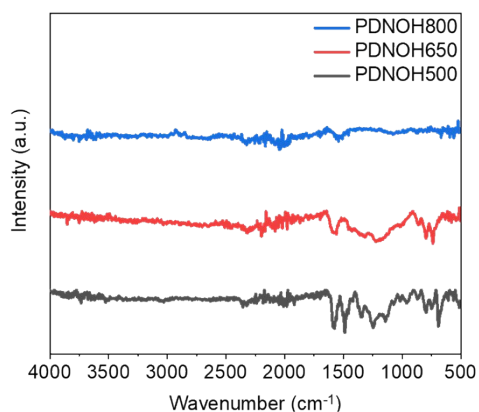

**Figure S4.** FT-IR spectra of PDNOHs.

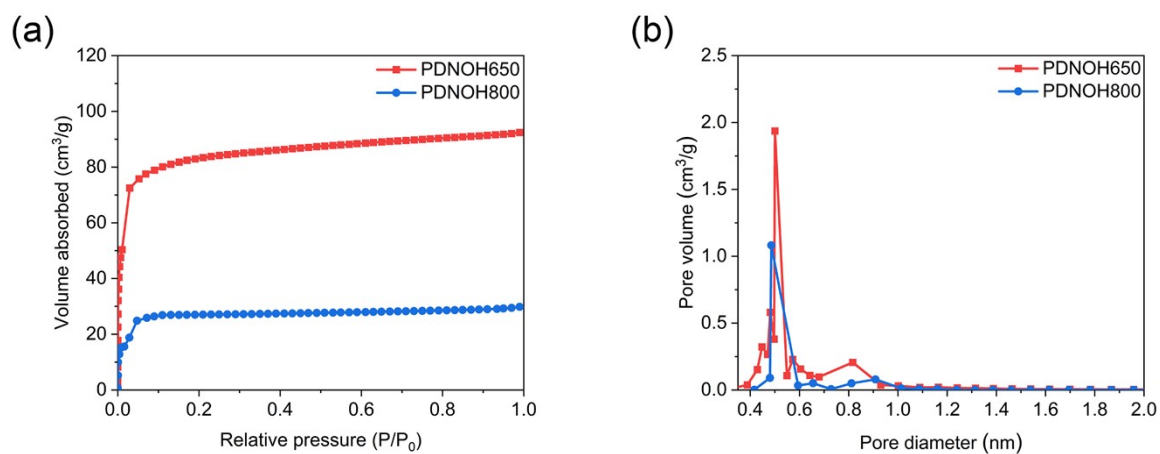

**Figure S5.** (a) Ar adsorption isotherms, (b) Pore-size distribution of PDNOHs.

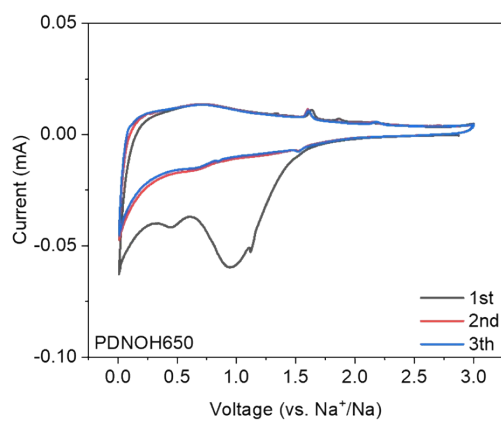

**Figure S6.** CV results of PDNOH-650.

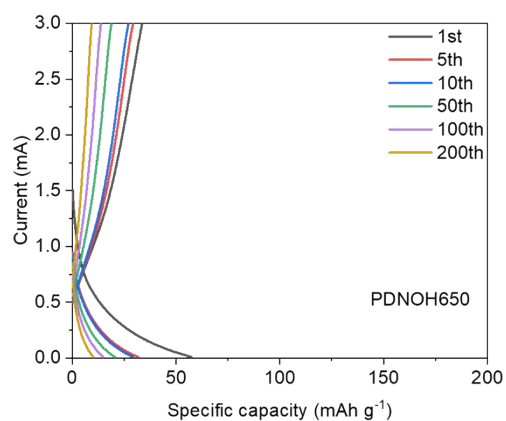

**Figure S7.** Charge/discharge curves of PDNOH-650.

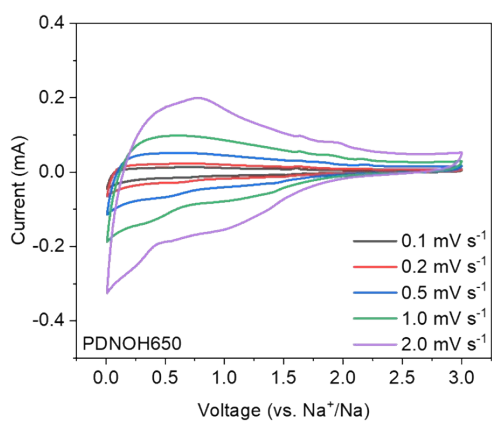

**Figure S8.** CV results of PDNOH-650 at various sweep rates.

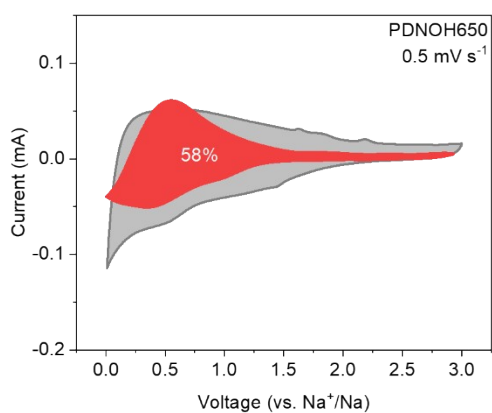

**Figure S9.** Contribution of surface-induced Na<sup>+</sup> storage in PDNOH-650 (0.5 mV s<sup>-1</sup>).

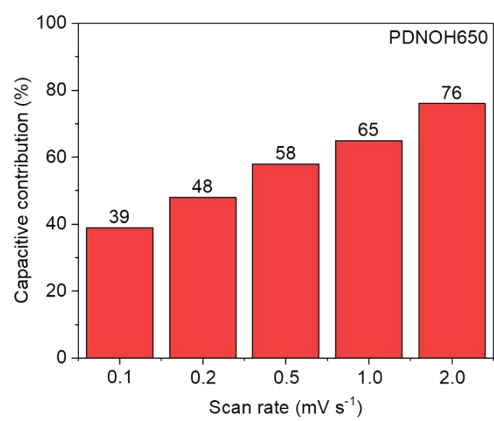

**Figure S10.** Contribution of surface-induced Na<sup>+</sup> storage at various sweep rates in PDNOH-650.

## References

- [1] T. Kim, T. Lee, Y. R. Yoon, W. S. Heo, S. Chae, J. W. Kim, B.-K. Kim, S. Y. Kim, J. Lee, J. H. Lee, *Small*, 2024, 2400333.
